# Supplementary material for: Fe3O4/rGO nanocomposite: synthesis and enhanced NOxgas-sensing properties at room temperature
Source: Royal Society of Chemistry journal article supplement (doi:10.1039/c6ra02306a), 2016-01-01
Supplement: c6ra02306a1.pdf [file c6ra02306a1.pdf]

## Fe<sub>3</sub>O<sub>4</sub>/rGO Nanocomposite: Synthesis and Enhanced NO<sub>x</sub> Gas-Sensing Properties at Room Temperature

Ying Yang,<sup>ab\*</sup> Li Sun,<sup>c</sup> Xiangting Dong,<sup>a\*\*</sup> Hui Yu,<sup>a</sup> Tingting Wang,<sup>a</sup> inxian Wang,<sup>a</sup> Ruihong Wang,<sup>b</sup> Wensheng Yu,<sup>a</sup> and Guixia Liu<sup>a</sup>

<sup>a</sup> Key Laboratory of Applied Chemistry and Nanotechnology at Universities of Jilin Province, Changchun University of Science and Technology, Changchun 130022. E-mail: yangying0807@126.com; dongxiangting888@163.com; Fax: +86 0431 85383815; Tel: +86 0431 85582574.

<sup>b</sup> Key Laboratory of Functional Inorganic Material Chemistry (Heilongjiang University), Ministry of Education, Harbin150080, P. R. China

<sup>c</sup> College of Chemistry and Chemical Engineering, Qiqihar University, Qiqihar 161006, P.R. China

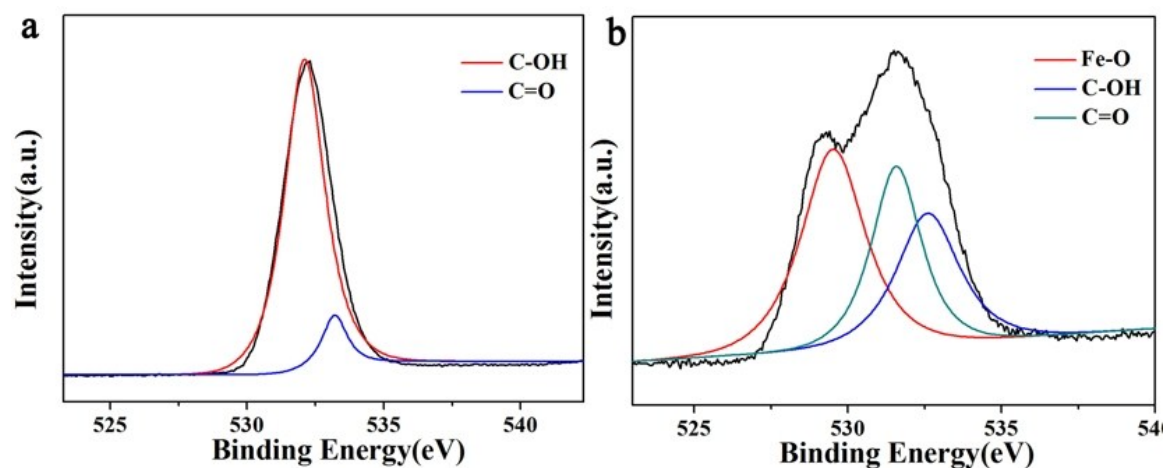

Fig. S1 XPS spectra of O 1s (a) GO (b) Fe/rGO2-400.

Tab.S1 The results of the surface area, pore volume and pore size for Fe<sub>3</sub>O<sub>4</sub>/rGO1-400,

Fe<sub>3</sub>O<sub>4</sub>/rGO2-400, Fe<sub>3</sub>O<sub>4</sub>/rGO3-400 and Fe<sub>3</sub>O<sub>4</sub>.

| Sample                                   | S <sub>BET</sub> (m <sup>2</sup> .g <sup>-1</sup> )<br>1) | pore volume (cm <sup>3</sup> .g <sup>-1</sup> ) | pore size (nm) |
|------------------------------------------|-----------------------------------------------------------|-------------------------------------------------|----------------|
| Fe <sub>3</sub> O <sub>4</sub>           | 57.13                                                     | 0.35                                            | 23.01          |
| Fe <sub>3</sub> O <sub>4</sub> /rGO1-400 | 79.61                                                     | 0.30                                            | 14.29          |
| Fe <sub>3</sub> O <sub>4</sub> /rGO2-400 | 160.39                                                    | 0.39                                            | 8.87           |
| Fe <sub>3</sub> O <sub>4</sub> /rGO3-400 | 172.03                                                    | 0.27                                            | 7.46           |

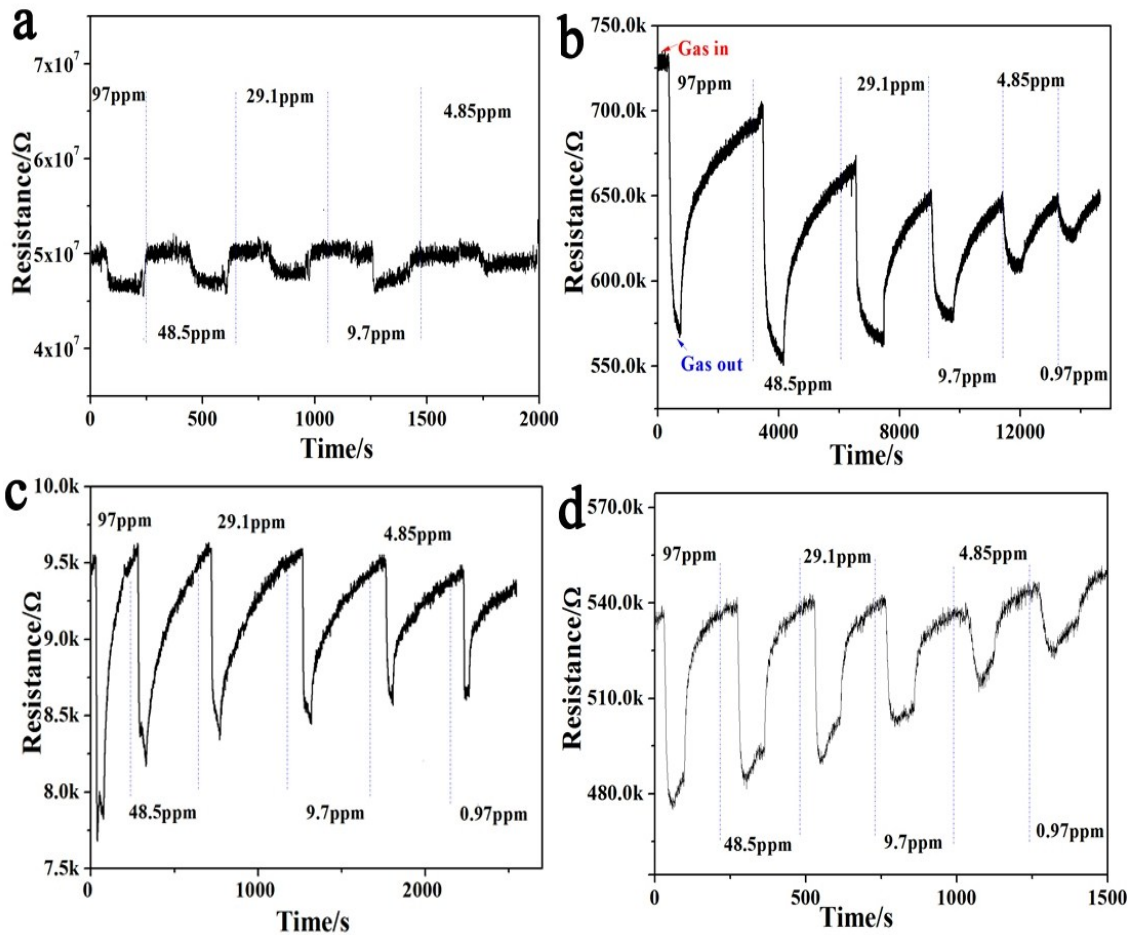

Fig. S2 The representative response-recovery cyclic curves of the gas response for Fe<sub>3</sub>O<sub>4</sub>/rGO1-400, Fe<sub>3</sub>O<sub>4</sub>/rGO3-400, Fe<sub>3</sub>O<sub>4</sub>/rGO4-400 and Fe<sub>3</sub>O<sub>4</sub> sensor to 97.0 ppm~0.97 ppm NO<sub>x</sub> operated at room temperature in air.

Tab. S2 The results of the gas response of Fe<sub>3</sub>O<sub>4</sub>/rGO1-400, Fe<sub>3</sub>O<sub>4</sub>/rGO2-400, Fe<sub>3</sub>O<sub>4</sub>/rGO3-400, Fe<sub>3</sub>O<sub>4</sub>/rGO3-400, Fe<sub>3</sub>O<sub>4</sub>/rGO4-400 and Fe<sub>3</sub>O<sub>4</sub> sensor to 97.0 ppm~0.97 ppm NO<sub>x</sub> operated at RT.

| sample                                   | Sensitivity (%) |          |          |          |          |          |
|------------------------------------------|-----------------|----------|----------|----------|----------|----------|
|                                          | 97.0 ppm        | 48.5 ppm | 29.1 ppm | 9.70 ppm | 4.85 ppm | 0.97 ppm |
| Fe <sub>3</sub> O <sub>4</sub>           | 4.9             | 4.7      | 4.0      | 5.3      | 3.6      | --       |
| Fe <sub>3</sub> O <sub>4</sub> /rGO1-400 | 21.4            | 20.5     | 15.4     | 11.4     | 5.6      | 2.7      |
| Fe <sub>3</sub> O <sub>4</sub> /rGO2-400 | 35.6            | 30.2     | 29.7     | 20.7     | 13.1     | 10.3     |
| Fe <sub>3</sub> O <sub>4</sub> /rGO3-400 | 17.0            | 13.9     | 11.9     | 11.2     | 8.7      | 7.6      |
| Fe <sub>3</sub> O <sub>4</sub> /rGO4-400 | 10.0            | 9.4      | 8.7      | 6.9      | 4.0      | 3.1      |

Tab.S3 The results of the gas response time of Fe<sub>3</sub>O<sub>4</sub>/rGO1-400, Fe<sub>3</sub>O<sub>4</sub>/rGO2-400, Fe<sub>3</sub>O<sub>4</sub>/rGO3-400, Fe<sub>3</sub>O<sub>4</sub>/rGO4-400 and Fe<sub>3</sub>O<sub>4</sub> sensor to 97.0 ppm~0.97 ppm NO<sub>x</sub> operated at RT.

| sample                                   | Response time (s) |          |          |          |          |          |
|------------------------------------------|-------------------|----------|----------|----------|----------|----------|
|                                          | 97.0 ppm          | 48.5 ppm | 29.1 ppm | 9.70 ppm | 4.85 ppm | 0.97 ppm |
| Fe <sub>3</sub> O <sub>4</sub>           | 23.0              | 44.0     | 46.3     | 15.3     | 36.6     | --       |
| Fe <sub>3</sub> O <sub>4</sub> /rGO1-400 | 75.0              | 106.0    | 201.3    | 240.6    | 280.3    | 300.7    |
| Fe <sub>3</sub> O <sub>4</sub> /rGO2-400 | 29.3              | 32.3     | 54.5     | 84.6     | 85.1     | 106.4    |
| Fe <sub>3</sub> O <sub>4</sub> /rGO3-400 | 14.7              | 16.7     | 17.3     | 17.3     | 21.3     | 26.0     |
| Fe <sub>3</sub> O <sub>4</sub> /rGO4-400 | 13.7              | 12.7     | 15.3     | 18.6     | 33.0     | 36.7     |

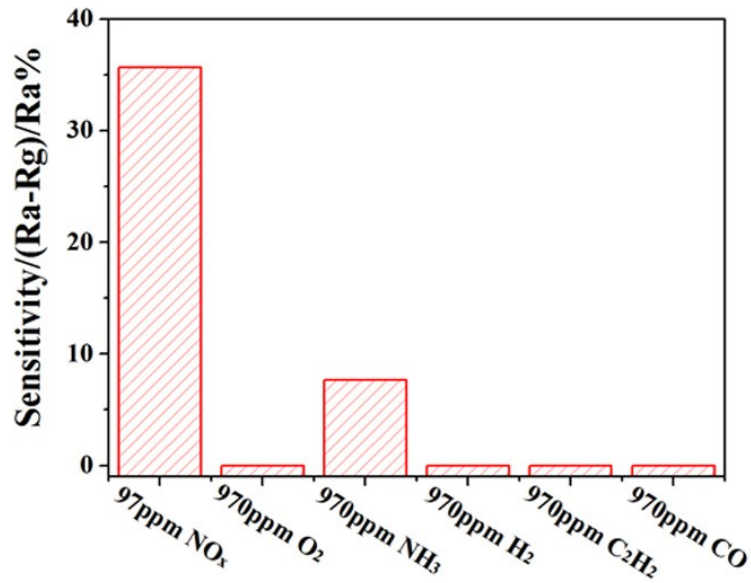

Fig. S3 Response of the Fe<sub>3</sub>O<sub>4</sub>/rGO2-400 sensor to different gases at room temperature

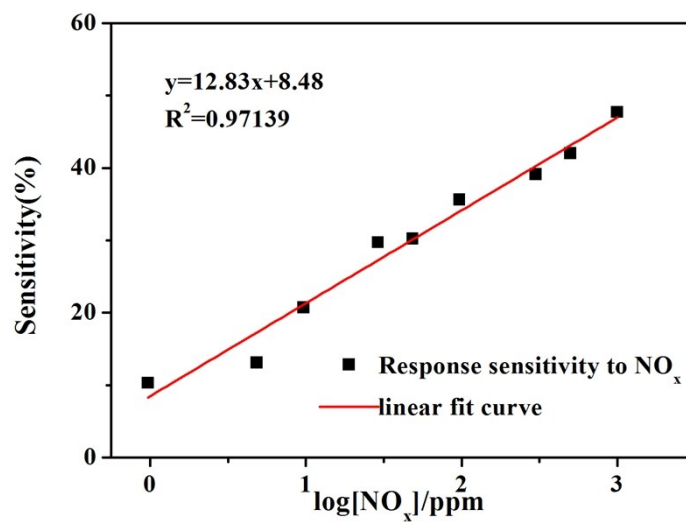

Fig. S4 Linear dependence relation between the gas sensitivity and relative NO<sub>x</sub> concentration for Fe<sub>3</sub>O<sub>4</sub>/rGO2-400 sensor to different gases at room temperature
